# Supplementary material for: A new tandem enrichment strategy for the simultaneous profiling of O-GlcNAcylation and phosphorylation in RNA-binding proteome
Source: Royal Society of Chemistry journal article supplement (doi:10.1039/d0an02305a), 2021-01-01
Supplement: d0an02305a4.pdf [file d0an02305a4.pdf]

## Supplementary Information

# A New Tandem Enrichment Strategy for Simultaneous Profiling of O-GlcNAcylation and Phosphorylation in RNA-binding Proteome

Zhiya Fan<sup>a</sup>, Jian Li<sup>a</sup>, Tong Liu<sup>a</sup>, Zheng Zhang<sup>a,b\*</sup>, Weijie Qin<sup>a\*</sup> and Xiaohong Qian<sup>a\*</sup>

<sup>a</sup>State Key Laboratory of Proteomics, National Center for Protein Sciences (Beijing), Beijing Institute of Lifeomics, Beijing Proteome Research Center, Beijing 102206, China

<sup>b</sup>Wuhan Prevention and Treatment Center for Occupational Diseases, Wuhan 430050, China

\*Corresponding author: zhangzheng\_wuhu@126.com, aunp\_dna@126.com and qianxh1@163.com

## **Materials and reagents**

Dulbecco's modified Eagle's medium (DMEM) and phosphate buffered saline (PBS) were purchased from Corning (NY, USA). Fetal bovine serum (FBS) and penicillin-streptomycin was purchased from Gibco (NY, USA). Trifluoroacetic acid (TFA), trypsin (from bovine pancreas, TPKC treated), ammonium bicarbonate ( $\text{NH}_4\text{HCO}_3$ ), dithiothreitol (DTT), iodoacetamide (IAA), and formic acid (FA) were all purchased from Sigma. ZIC-HILIC ( $5\mu\text{m}$ ,  $200\text{\AA}$ ) was purchased from Merck KGaA (Darmstadt, Germany). Formaldehyde (37%), tris-hydroxypropyltriazolymethylamine (THPTA), sodium L-ascorbate, Cy5-azide, myoglobin, NHS-alkyne, biotin-azide, acetonitrile (ACN) and uridine were all purchased from Sigma-Aldrich (Germany). Ethynyluridine (EU), actinomycin D and hydroxyurea were obtained from J&K Scientific Co. Ltd. (Beijing, China). Complete protease inhibitor cocktail tablets were received from Roche (Mannheim, Germany). Ribonucleoside Vanadyl Complex RNase inhibitor, PNGase F and galactose oxidase were purchased from New England Biolabs (USA). RNase A ( $100\text{ mg mL}^{-1}$ ) was purchased from Kangwei Century Biotechnology Co., Ltd. (Beijing, China). Albumin from bovine serum V (BSA) was purchased from Beijing BioDee Biotechnology Co. Ltd (Beijing, China). NE-PER Nuclear and Cytoplasmic Extraction Reagents, Dynabeads® M-280 Streptavidin-coated magnetic beads and TRIzol reagent were all purchased from ThermoFisher (USA). DEPC-treated water was purchased from Sangon Biotechnology Co., Ltd. (Shanghai, China). The deionized water used in all experiments (Resistance  $> 18.2\text{ M}\Omega\text{ cm}^{-1}$ ) was prepared using a Millipore purification system (Billerica, MA). All the buffers used in the RNA related experiments were prepared using DEPC-treated water containing RNase inhibitor and all the experimental supplies were RNase-free grade, unless otherwise mentioned.

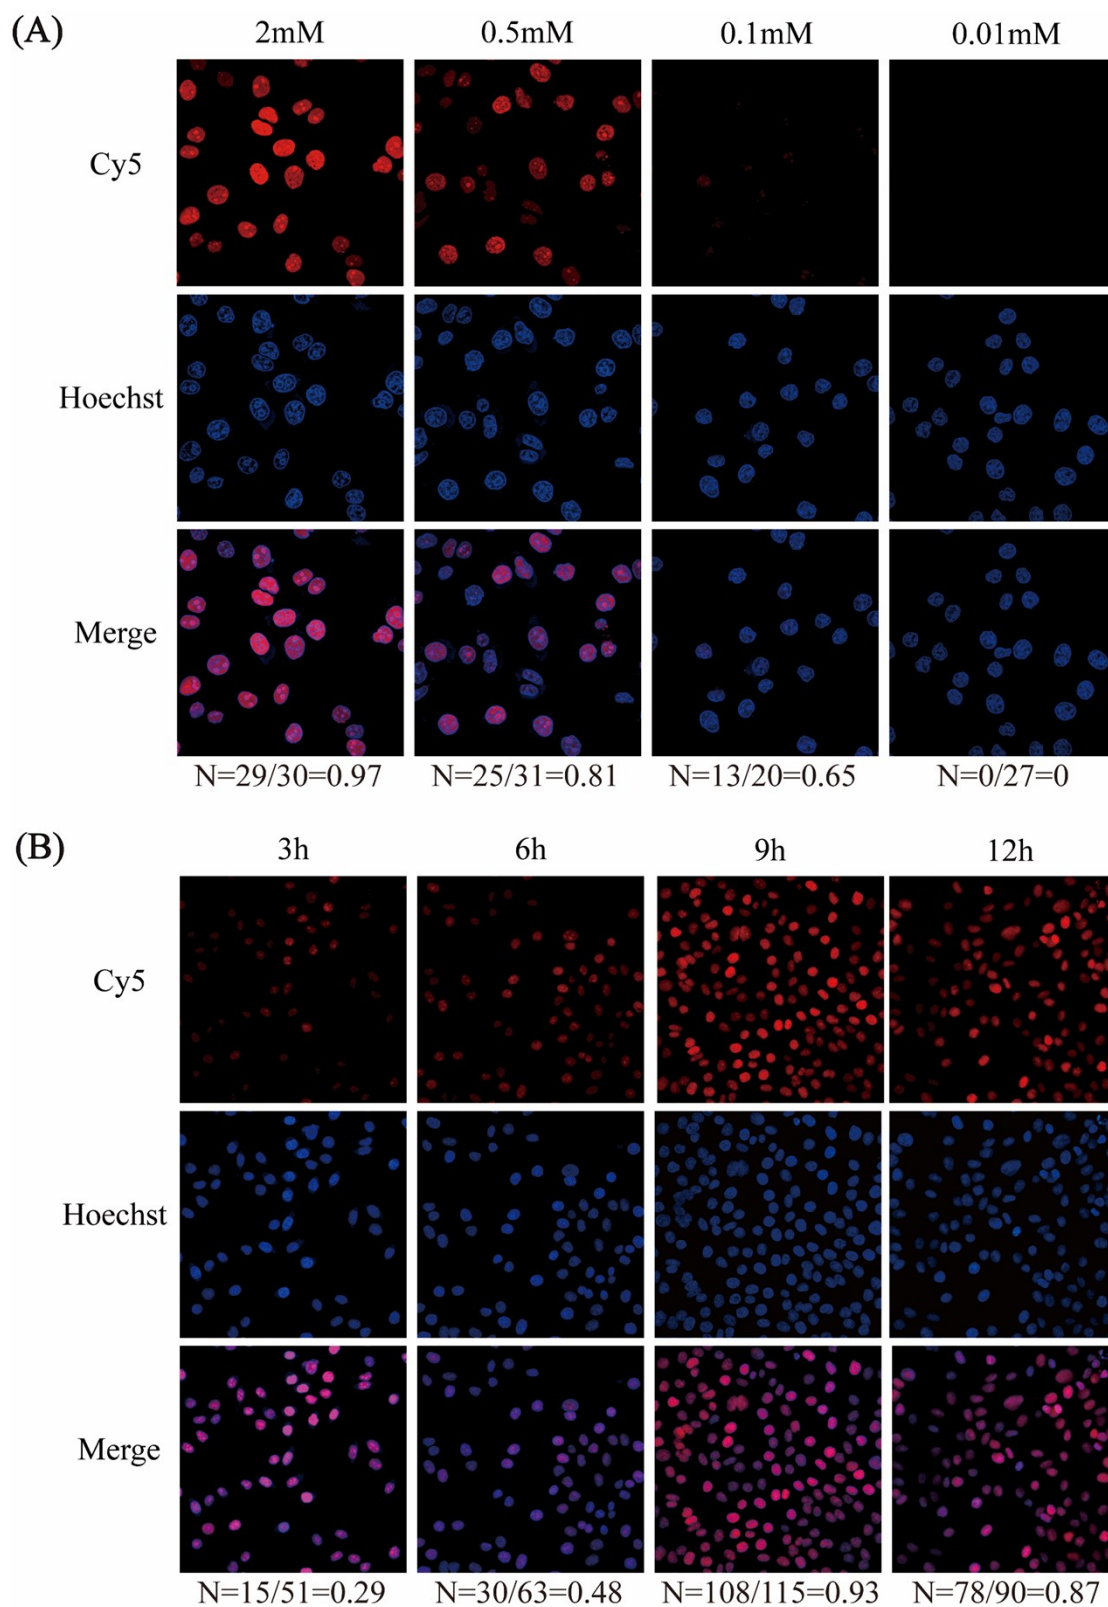

**Fig.S1** (A) Confocal laser scanning microscopy (CLSM) images and the corresponding labeling efficiency  $N$  of HeLa cells treated with 2mM EU, 0.5mM EU, 0.1mM EU and 0.01mM EU, respectively. (B) CLSM images and the corresponding labeling efficiency  $N$  of HeLa cells treated with 0.5mM EU for 3h, 6h, 9h and 12h, respectively.

**Table 1.** Number of O-GlcNAc-peptides and phospho-peptides enriched by HILIC under different conditions<sup>a</sup>.

|            | Number of O-GlcNAc-peptides | Number of phospho-peptides |
|------------|-----------------------------|----------------------------|
| NC-5%FA    | 10                          | 72                         |
|            | 19                          | 164                        |
|            | 20                          | 123                        |
| NC-0.1%TFA | 13                          | 79                         |
|            | 74                          | 120                        |
|            | 86                          | 117                        |
| NC-1%TFA   | 234                         | 476                        |
|            | 415                         | 590                        |
|            | 462                         | 550                        |

<sup>a</sup> The table highlights results extracted from Orbitrap Fusion MS data obtained from HILIC enrichments from nucleocytoplasmic proteins. The experiments were performed with three technical replicates. NC, nucleocytoplasmic proteins.
